# Supplementary material for: Coarse-grained simulations of stretching entangled DNA using oscillating electric fields
Source: Royal Society of Chemistry journal article supplement (doi:10.1039/c0cc02090g), 2010-09-08
Supplement: c0cc02090g.pdf [file c0cc02090g.pdf]

## Supplementary Information: Coarse-grained simulations of stretching entangled DNA using oscillating electric fields.

Richard S. Graham<sup>1</sup> and Ronald G. Larson<sup>2</sup>

<sup>1</sup>*School of Mathematical Sciences, University of Nottingham, Nottingham NG7 2RD, UK.*

<sup>2</sup>*Department of Chemical Engineering, University of Michigan, Ann Arbor, Michigan 48109, USA.*

The accompanying movie shows the DNA primitive path during a simulation illustrating the stretching mechanism. Model parameter used are the same as in the main text, with the field given by  $\epsilon = 10$  and  $\omega\tau_e = 0.3$ . The simulation runs for a time period of  $23\tau_e$ . The colours represent the local stretch, with red being highly stretched through to light green being unstretched.
